# Supplementary material
Source: PubMed Central journal article supplement (PMC6645793)
Supplement: ao7b01776_si_001.pdf [file ao7b01776_si_001.pdf]

*Supplementary Information for***Structural Insight of Amyloidogenic Intermediates of Human Insulin**

Sandip Dolui<sup>a</sup>, Anupam Roy<sup>a</sup>, Uttam Pal<sup>b</sup>, Achintya Saha<sup>c</sup>, Nakul C Maiti<sup>a\*</sup>

<sup>a</sup>Structural Biology and Bioinformatics Division, Indian Institute of Chemical Biology, Council of Scientific and Industrial Research, 4, Raja S.C. Mullick Road, Kolkata 700032, India

<sup>b</sup>Chemical Sciences Division, Saha Institute of Nuclear Physics, 1/AF Bidhannagar, Kolkata, India

<sup>c</sup>Department of Chemical Technology, University of Calcutta, 92 Acharya Prafulla Chandra Road, Calcutta 700009, India Received date:

Corresponding Author

E-mail: [ncmaiti@iicb.res.in](mailto:ncmaiti@iicb.res.in),

Phone: +91-33-2499-5886

Fax: +91-33-2473-5197

**Supporting Information**

Figure S1: Raman spectrum of human insulin in its solid state.

Figure S2: SDS-PAGE electrophoresis of insulin solutions at the different time point of incubation.

Table S1: Raman vibrational bands ( $\text{cm}^{-1}$ ) of insulin monomer as air dried, solid powder, and in the aqueous solution state.

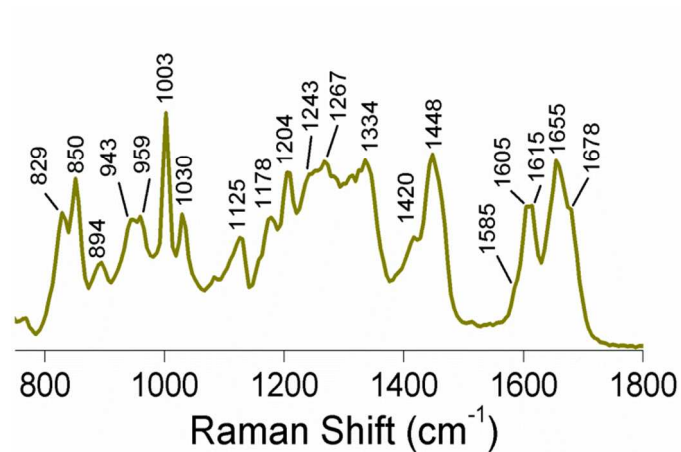

**Figure S1.** Raman spectrum of human insulin (zinc free) in its solid state. Laser power at source 20 mW,  $\sim 1$  mW at the sample. The same instrument as in the original manuscript was used to record the Raman spectrum.

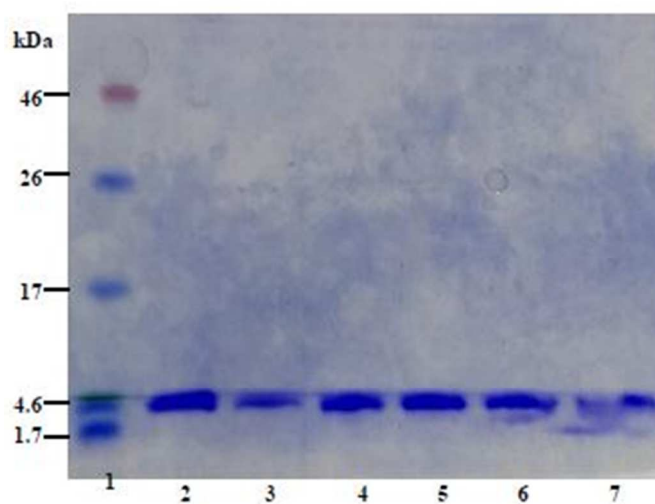

**Figure S2.** SDS-PAGE electrophoresis of insulin solutions taken at the different time point of incubation. Insulin solution 1.5 mg/ml was incubated at pH 1.8, 60 °C for 3 h. Lane 1: protein marker bands, lanes 2-7 are for insulin incubated for 0, 60, 120, 135, 150, 160 and 180 min, respectively.

**Table S1.** Raman vibrational bands ( $\text{cm}^{-1}$ ) of insulin monomer as air dried, solid powder, and in the aqueous solution state (from reference <sup>1</sup>).

| Air dried | Solid state | Aqueous solution state | Modes of Raman vibration                                          |
|-----------|-------------|------------------------|-------------------------------------------------------------------|
| 830       | 829         | 830                    | Tyr                                                               |
| 854       | 850         | 852                    | Tyr                                                               |
| 898       | 894         | 890                    | C <sub>α</sub> -C stretching                                      |
| 940,949   | 943         | 945                    | helix Skeletal, C <sub>α</sub> -C stretching                      |
| 962       | 959         | 960                    | Skeletal beta strand, C <sub>α</sub> -C stretching                |
| 1004      | 1003        | 1003                   | Phe                                                               |
| 1033      | 1030        | 1032                   | Tyr                                                               |
| 1130      | 1125        | 1130                   | CH <sub>2</sub> symmetric rock+ C <sub>α</sub> -C stretching      |
| 1156,1177 | 1178        | 1175                   | Phe, Tyr                                                          |
| 1205      | 1204        | 1209                   | Tyr, Phe                                                          |
| 1249      | 1243        | 1240                   | Poly-l-proline, Amide III                                         |
| 1262,1269 | 1267        | 1269                   | α-helix, Amide III                                                |
| 1343      | 1334        | 1343                   | C <sub>α</sub> -H deformation, Pure α-helix, Amide III            |
| 1421,1449 | 1448        | 1446                   | CH <sub>2</sub> , CH <sub>3</sub> & CH deformation and scissoring |
| 1465      | -           | 1460                   |                                                                   |
| 1587      | -           | -                      | Phe                                                               |
| 1605      | 1605        | 1608                   | Phe aromatic vibration                                            |
| 1615      | 1615        | 1616                   | Tyr aromatic vibration                                            |
| 1659      | 1655        | 1662                   | α-helix, Amide I                                                  |
| 1676      | 1678        | -                      | Extended PP II                                                    |

## References

- (1) Yamamoto, S.; Kaminský, J.; Bouř, P. Structure and Vibrational Motion of Insulin from Raman Optical Activity Spectra. *Anal. Chem.* **2012**, *84* (5), 2440–2451.
